# Supplementary material for: Clinical and Genetic Features of Brainstem Glioma in Adults: A Report of 50 Cases in a Single Center
Source: PubMed Central journal article supplement — J Clin Neurol. 2021 Jan 18;17(2):220–8. doi: 10.3988/jcn.2021.17.2.220 (PMC8053546; doi:10.3988/jcn.2021.17.2.220), 2021-01-18
Supplement: jcn-17-220-s001.pdf [file jcn-17-220-s001.pdf]

**Supplementary Table 1.** Gene panel for detecting adult brainstem gliomas at our institution

| Gene mutation |          |      |        |         | Gene rearrangement | Copy number variation |
|---------------|----------|------|--------|---------|--------------------|-----------------------|
| ACVR1         | DAXX     | IDH2 | NF2    | RGPD3   | BRAF               | CDK4                  |
| AKT1          | DDX3X    | KDR  | NOTCH1 | SETD2   | FGFR3              | CDK6                  |
| ATRX          | EGFR     | KIT  | NRAS   | SMARCB1 | RELA               | EGFR                  |
| BCOR          | FAT1     | KLF4 | PDGFRA | SMARCE1 | YAP1               | KDR                   |
| BRAF          | FGFR1    | KRAS | PIK3CA | SMO     |                    | KIT                   |
| BRCA1         | FGFR3    | MDM4 | PIK3R1 | TERT    |                    | MET                   |
| BRCA2         | FUBP1    | MEN1 | PLCG1  | TP53    |                    | MYC                   |
| CDK4          | GNAQ     | MET  | PMS2   | TRAF7   |                    | PDGFRA                |
| CDK6          | GNAS     | MLH1 | PPM1D  | TSC1    |                    |                       |
| CDKN2A        | H3F3A    | MSH2 | PTCH1  | TSC2    |                    |                       |
| CDKN2B        | HIST1H3B | MSH6 | PTEN   | USP8    |                    |                       |
| CHEK2         | HIST1H3C | MYC  | PTPN11 | YAP1    |                    |                       |
| CIC           | HRAS     | MYCN | RB1    |         |                    |                       |
| CTNNB1        | IDH1     | NF1  | RELA   |         |                    |                       |
