# Supplementary material for: Clinical and Genetic Features of Brainstem Glioma in Adults: A Report of 50 Cases in a Single Center
Source: PubMed Central journal article supplement — J Clin Neurol. 2021 Jan 18;17(2):220–8. doi: 10.3988/jcn.2021.17.2.220 (PMC8053546; doi:10.3988/jcn.2021.17.2.220), 2021-01-18
Supplement: jcn-17-220-s002.pdf [file jcn-17-220-s002.pdf]

**Supplementary Table 2.** Common genetic alterations and overall survival of 50 adult brainstem glioma patients

| Patient no. | Diagnosis | Status | Survival time (months) | IDH1/2 | MGMT promoter | 1p  | 19q | TERT promoter | ATRX | TP53 | PTEN | EGFR | NF1 | RB1 | PIK3CA | MSH2 | MSH6 | EGFR amp* | PDGFR amp | MET amp | CDK4 amp |
|-------------|-----------|--------|------------------------|--------|---------------|-----|-----|---------------|------|------|------|------|-----|-----|--------|------|------|-----------|-----------|---------|----------|
| 1           | PA        | Alive  | 38.0                   |        |               | LOH |     |               |      |      |      |      |     |     |        |      |      |           |           |         |          |
| 2           | DA        | Dead   | 18.0                   |        |               |     |     |               |      |      | Mut  | Mut  | Mut |     |        |      |      |           |           |         |          |
| 3           | DA        | Dead   | 22.0                   | Mut    | Methylated    | LOH |     |               | Loss | Mut  |      |      |     |     |        |      |      |           |           |         |          |
| 4           | DA        | Dead   | 29.0                   | Mut    |               |     |     |               |      |      |      |      |     |     |        |      |      |           |           |         |          |
| 5           | DA        | Dead   | 28.0                   |        | Methylated    | LOH |     |               |      | Mut  | Mut  |      |     |     |        |      |      |           |           |         |          |
| 6           | DA        | Alive  | 32.0                   |        |               |     | LOH |               |      | Mut  |      |      |     |     |        |      |      | 3.0       |           |         | 6.0      |
| 7           | DA        | Dead   | 34.0                   | Mut    |               | LOH |     |               |      | Mut  |      |      |     |     |        |      |      |           |           |         |          |
| 8           | DA        | Dead   | 36.0                   |        |               | LOH | LOH |               |      |      |      |      |     | Mut |        | Mut  |      |           |           |         |          |
| 9           | DA        | Alive  | 40.0                   | Mut    |               |     |     |               |      | Mut  |      |      |     |     |        |      |      |           |           |         |          |
| 10          | DA        | Dead   | 42.0                   |        |               |     |     |               |      |      |      | Mut  |     |     |        |      |      |           |           |         |          |
| 11          | O         | Alive  | 33.0                   |        |               | LOH | LOH | Mut           |      |      |      |      |     |     |        |      |      |           |           |         |          |
| 12          | O         | Dead   | 41.0                   | Mut    | Methylated    | LOH | LOH |               |      |      |      |      |     |     |        |      |      |           |           |         |          |
| 13          | AA        | Dead   | 11.0                   |        |               | LOH | LOH | Mut           |      | Mut  | Mut  |      | Mut |     |        |      |      |           |           |         |          |
| 14          | AA        | Dead   | 6.1                    |        |               |     |     |               |      | Mut  |      |      | Mut |     |        | Mut  |      |           |           |         |          |
| 15          | AA        | Dead   | 17.5                   |        | Methylated    |     | LOH |               |      |      | Mut  |      | Mut |     |        |      |      | 6.0       |           |         | 10.0     |
| 16          | AA        | Dead   | 13.0                   |        |               | LOH |     | Mut           |      |      | Mut  |      |     |     |        |      |      |           |           |         |          |
| 17          | AA        | Dead   | 13.5                   |        |               |     | LOH |               |      | Mut  | Mut  |      | Mut |     |        |      |      |           |           |         |          |
| 18          | AA        | Dead   | 16.2                   |        | Methylated    |     |     |               |      |      |      |      |     |     |        |      |      |           | 2.7       |         | 8.0      |
| 19          | AA        | Dead   | 17.0                   |        |               |     | LOH |               | Loss | Mut  | Mut  |      |     | Mut |        | Mut  |      |           |           | 6.5     |          |
| 20          | AA        | Dead   | 19.0                   |        | Methylated    | LOH |     | Mut           |      |      | Mut  |      |     |     |        |      |      |           |           |         |          |
| 21          | AA        | Dead   | 24.5                   |        | Methylated    |     | LOH | Mut           |      |      |      |      | Mut |     | Mut    |      |      |           |           |         |          |
| 22          | AA        | Dead   | 21.0                   | Mut    | Methylated    |     |     |               | Loss | Mut  |      |      |     |     |        |      |      |           |           |         |          |
| 23          | AA        | Alive  | 26.0                   |        |               |     | LOH |               | Loss | Mut  |      |      | Mut |     |        |      | Mut  |           |           |         |          |
| 24          | AA        | Alive  | 32.0                   |        |               |     |     |               | Loss | Mut  |      |      | Mut |     | Mut    |      |      |           |           |         |          |
| 25          | GBM       | Dead   | 0.5                    |        |               | LOH | LOH |               |      | Mut  | Mut  |      |     | Mut |        |      |      |           |           |         |          |
| 26          | GBM       | Dead   | 2.0                    |        |               |     | LOH | Mut           |      |      |      |      |     |     |        |      |      |           | 2.0       |         | 11.0     |
| 27          | GBM       | Dead   | 2.5                    |        | Methylated    |     |     | Mut           |      |      |      |      |     |     | Mut    |      |      |           |           | 2.1     |          |
| 28          | GBM       | Dead   | 3.1                    |        |               | LOH |     |               |      | Mut  |      |      |     |     |        |      |      |           |           |         | 10.0     |
| 29          | GBM       | Dead   | 4.0                    |        |               |     |     |               |      |      | Mut  |      |     |     |        |      |      | 7.7       |           |         |          |
| 30          | GBM       | Dead   | 4.5                    |        |               | LOH |     |               |      |      |      |      |     |     |        |      |      |           |           |         |          |
| 31          | GBM       | Dead   | 5.0                    |        |               | LOH |     | Mut           |      |      | Mut  |      |     |     |        |      |      | 7.1       |           |         |          |
| 32          | GBM       | Dead   | 7.8                    |        |               |     |     | Mut           |      |      |      |      |     |     |        |      |      |           |           |         |          |
| 33          | GBM       | Dead   | 8.0                    |        | Methylated    |     |     |               |      |      |      |      |     |     |        |      |      |           | 7.0       |         |          |
| 34          | GBM       | Dead   | 9.0                    |        |               |     |     | Mut           |      |      | Mut  |      |     |     | Mut    |      |      |           |           |         |          |
| 35          | GBM       | Dead   | 9.5                    | Mut    |               | LOH |     |               |      | Mut  |      |      |     |     |        |      |      |           |           |         |          |
| 36          | GBM       | Dead   | 10.0                   |        | Methylated    |     |     |               |      |      |      |      |     |     |        |      |      |           |           |         |          |
| 37          | GBM       | Dead   | 10.3                   |        |               | LOH |     |               |      | Mut  | Mut  |      | Mut |     |        |      |      |           |           |         |          |
| 38          | GBM       | Dead   | 11.0                   |        | Methylated    |     |     | Mut           |      | Mut  |      |      |     |     |        |      |      | 12.0      |           |         |          |
| 39          | GBM       | Dead   | 11.4                   |        |               | LOH | LOH | Mut           |      | Mut  | Mut  |      |     |     |        |      |      |           |           |         |          |
| 40          | GBM       | Dead   | 12.0                   |        |               |     |     |               |      | Mut  | Mut  |      |     | Mut |        |      |      |           |           |         |          |
| 41          | GBM       | Dead   | 12.2                   |        |               |     | LOH |               |      |      |      |      |     |     | Mut    |      |      |           |           |         |          |
| 42          | GBM       | Dead   | 12.5                   |        |               |     |     |               |      | Mut  | Mut  | Mut  | Mut |     | Mut    |      | Mut  |           |           |         |          |
| 43          | GBM       | Dead   | 14.5                   |        |               |     |     | Mut           |      | Mut  | Mut  |      |     |     |        |      |      | 5.0       |           |         |          |
| 44          | GBM       | Alive  | 16.0                   |        | Methylated    | LOH | LOH |               |      |      | Mut  |      |     |     |        |      |      |           |           |         |          |
| 45          | GBM       | Dead   | 17.0                   |        |               |     |     |               |      |      | Mut  |      | Mut |     |        |      |      |           |           |         |          |
| 46          | GBM       | Dead   | 19.6                   |        |               |     |     |               |      |      | Mut  |      |     |     |        |      |      |           |           |         |          |
| 47          | DMLG      | Dead   | 3.5                    |        | Methylated    | LOH |     |               |      |      |      |      |     |     | Mut    |      |      |           |           |         |          |
| 48          | DMLG      | Dead   | 7.2                    |        | Methylated    | LOH | LOH |               |      |      |      |      |     |     |        |      |      |           |           |         |          |
| 49          | DMLG      | Dead   | 7.5                    |        | Methylated    |     |     |               |      | Mut  | Mut  |      |     |     |        |      |      | 10.6      |           |         |          |
| 50          | DMLG      | Dead   | 13.0                   |        |               |     |     |               |      | Mut  |      |      |     |     |        |      |      |           |           |         |          |

\*Relative change in gene amplification.

AA: anaplastic astrocytoma, amp: amplification, DA: diffuse astrocytoma, DMLG: diffuse midline glioma, GBM: glioblastoma, LOH: loss of heterozygosity, Mut: mutated, O: oligodendroglioma, PA: pilocytic astrocytoma.
