# Supplementary material for: Clinical and Genetic Features of Brainstem Glioma in Adults: A Report of 50 Cases in a Single Center
Source: PubMed Central journal article supplement — J Clin Neurol. 2021 Jan 18;17(2):220–8. doi: 10.3988/jcn.2021.17.2.220 (PMC8053546; doi:10.3988/jcn.2021.17.2.220), 2021-01-18
Supplement: jcn-17-220-s005.pdf [file jcn-17-220-s005.pdf]

**Supplementary Table 5.** Results of univariate and multivariate analyses of factors associated with OS of 22 patients with brainstem glioblastoma

| Variable                                           | Univariate analysis |       | Multivariate analysis |                    |          |
|----------------------------------------------------|---------------------|-------|-----------------------|--------------------|----------|
|                                                    | <i>p</i>            | HR    | 95% CI                | Median OS (months) | <i>p</i> |
| Age (≥55 years vs. <55 years)                      | 0.666               |       |                       |                    |          |
| Sex (female vs. male)                              | 0.397               |       |                       |                    |          |
| KPS (≥70 vs. <70)                                  | 0.132               |       |                       |                    | 0.091    |
| Course of disease (≥3 months vs. <3 months)        | 0.192               |       |                       |                    | 0.137    |
| Diameter (≥2 cm vs. <2 cm)                         | 0.045               |       |                       |                    | 0.399    |
| Location (pons vs. midbrain vs. medulla)           | 0.730               |       |                       |                    |          |
| Tumor Enhancement (yes vs. no)                     | 0.007               | 5.647 | 1.517–21.013          | 7.8 vs. 12.5       | 0.010    |
| <i>IDH</i> (mutant vs. wild type)                  | 0.678               |       |                       |                    |          |
| <i>MGMT</i> promoter (methylated vs. unmethylated) | 0.892               |       |                       |                    |          |
| 1p/19q (LOH vs. intact)                            | 0.315/0.525         |       |                       |                    |          |
| <i>TERT</i> promoter (mutant vs. wild type)        | 0.214               |       |                       |                    |          |
| <i>TP53</i> (mutant vs. wild type)                 | 0.883               |       |                       |                    |          |
| <i>PTEN</i> (mutant vs. wild type)                 | 0.016               |       |                       |                    | 0.548    |
| <i>NF1</i> (mutant vs. wild type)                  | 0.329               |       |                       |                    |          |
| <i>PIK3CA</i> (mutant vs. wild type)               | 0.882               |       |                       |                    |          |
| <i>EGFR</i> amplification (yes vs. no)             | 0.390               |       |                       |                    |          |

CI: condence interval, HR: hazard ratio, KPS: Karnofsky performance status, LOH: loss of heterozygosity, OS: overall survival.
